# Supplementary material for: Koch's postulates fulfilled for SARS virus
Source: Springer Nature journal article supplement (doi:10.1038/423240a), 2003-05-14
Supplement: 41586_2003_BF423240a_MOESM1_ESM.pdf [file 41586_2003_BF423240a_MOESM1_ESM.pdf]

Table 1. Detection of SCV-infection in cynomolgus macaques\*

| Time after inoculation (days)       | Macaque # 1 <sup>†</sup> |      |                   |      | Macaque # 2 <sup>†</sup>            |      |        |      | Macaque # 3 <sup>†</sup>            |      |        |      | Macaque # 4 <sup>†</sup>            |      |        |      |
|-------------------------------------|--------------------------|------|-------------------|------|-------------------------------------|------|--------|------|-------------------------------------|------|--------|------|-------------------------------------|------|--------|------|
|                                     | Throat                   | Nose | Faeces            | IF   | Throat                              | Nose | Faeces | IF   | Throat                              | Nose | Faeces | IF   | Throat                              | Nose | Faeces | IF   |
| 0                                   | -                        | -    | N.T. <sup>‡</sup> | -    | -                                   | -    | N.T.   | -    | -                                   | -    | -      | -    | -                                   | -    | -      | -    |
| 2                                   | +                        | +    | N.T.              | N.T. | +                                   | +    | N.T.   | N.T. | -                                   | +    | -      | N.T. | +                                   | +    | -      | N.T. |
| 4                                   | +                        | +    | -                 | N.T. | +                                   | +    | +      | N.T. | -                                   | +    | -      | N.T. | +                                   | +    | -      | N.T. |
| 6                                   | -                        | -    | -                 | N.T. | +                                   | +    | -      | N.T. | -                                   | +    | -      | -    | +                                   | +    | -      | -    |
| 8                                   | -                        | -    | -                 | N.T. | +                                   | +    | -      | N.T. | Euthanised 6 days after inoculation |      |        |      | Euthanised 6 days after inoculation |      |        |      |
| 10                                  | -                        | -    | -                 | -    | -                                   | +    | -      | -    |                                     |      |        |      |                                     |      |        |      |
| 12                                  | -                        | -    | -                 | N.T. | -                                   | -    | -      | N.T. |                                     |      |        |      |                                     |      |        |      |
| 14                                  | -                        | -    | -                 | N.T. | -                                   | -    | -      | N.T. |                                     |      |        |      |                                     |      |        |      |
| 16                                  | -                        | -    | -                 | +    | -                                   | -    | -      | +    |                                     |      |        |      |                                     |      |        |      |
| Euthanised day 16 after inoculation |                          |      |                   |      | Euthanised day 16 after inoculation |      |        |      |                                     |      |        |      |                                     |      |        |      |

\* Virus detection in throat, nose and faecal specimens was considered positive if Taqman RT-PCR and/or virus isolation in Vero cells yielded a positive result. Immunofluorescence was performed with SCV-infected Vero cells on microscopic glass slides using serial dilutions of the macaque serum as primary antibody and FITC-labeled anti-human IgG, IgA, IgM antibodies as secondary reagent.

<sup>†</sup> Macaques 1 and 2 were infected with 10<sup>3</sup> TCID<sub>50</sub> in a 5 ml volume. Macaques 3 and 4 were infected with 10<sup>6</sup> TCID<sub>50</sub> in a 5 ml volume. A few drops of the virus preparations were administered on each of the conjunctiva, 0.5 ml in the nose and the remainder in the trachea.

<sup>‡</sup> N.T. Not tested.
